# Supplementary material
Source: publisher figshare collection journal article supplement (https://sage.figshare.com/ndownloader/files/12370649)
Supplement: Supplementary file 1 [file 12370649]

Gimeno, H., Polatajko, H. J., Cornelius, V., Lin, J.-P., & Brown, R. G. (2018). Protocol for N-of-1 trials with replications across therapists for childhood-onset dystonia rehabilitation: Study 2. *Canadian Journal of Occupational Therapy*, 85, 256–261. doi:10.1177/0008417417707532

## Appendix A: Trial flowchart for study 2

| <b>STUDY PERIOD – Study 2 (N-of-1 with systematic replication across therapists, 20 participants)</b> |                  |                 |       |                   |       |                        |       |       |       |       |       |       |       |       |          |               |       |                  |
|-------------------------------------------------------------------------------------------------------|------------------|-----------------|-------|-------------------|-------|------------------------|-------|-------|-------|-------|-------|-------|-------|-------|----------|---------------|-------|------------------|
|                                                                                                       | <b>Enrolment</b> | <b>Baseline</b> |       |                   |       | <b>Post-allocation</b> |       |       |       |       |       |       |       |       |          | <b>Review</b> |       | <b>Close out</b> |
|                                                                                                       |                  |                 |       |                   |       | <b>INTERVENTION</b>    |       |       |       |       |       |       |       |       |          | <b>Post</b>   |       |                  |
| <b>TIMEPOINT</b>                                                                                      |                  | $b_1$           | $b_2$ | ( $b_3 - b_5$ )   | $b_6$ | $t_1$                  | $t_2$ | $t_3$ | $t_4$ | $t_5$ | $t_6$ | $t_7$ | $t_8$ | $t_9$ | $t_{10}$ | $e_1$         | $e_2$ |                  |
| <b>ENROLMENT</b>                                                                                      |                  |                 |       |                   |       |                        |       |       |       |       |       |       |       |       |          |               |       |                  |
| Patient identification                                                                                | X                |                 |       |                   |       |                        |       |       |       |       |       |       |       |       |          |               |       |                  |
| Eligibility screen                                                                                    | X                |                 |       |                   |       |                        |       |       |       |       |       |       |       |       |          |               |       |                  |
| Patient recruitment<br><i>(inc consent)</i>                                                           | X                |                 |       |                   |       |                        |       |       |       |       |       |       |       |       |          |               |       |                  |
| Randomization<br>( $b_1 - b_2$ or to $b_1 - b_6$ )                                                    | X                |                 |       |                   |       |                        |       |       |       |       |       |       |       |       |          |               |       |                  |
| <b>INTERVENTIONS</b>                                                                                  |                  |                 |       |                   |       |                        |       |       |       |       |       |       |       |       |          |               |       |                  |
| CO-OP                                                                                                 |                  |                 |       |                   |       |                        |       |       |       |       |       |       |       |       |          |               |       |                  |
| <b>ASSESSMENTS</b>                                                                                    |                  |                 |       |                   |       |                        |       |       |       |       |       |       |       |       |          |               |       |                  |
| COPM                                                                                                  |                  | X               |       |                   | X     |                        |       |       |       |       |       |       |       |       |          |               | X     |                  |
| PQRS                                                                                                  |                  | XXX             | XXX   | XXX<br>XXX<br>XXX | XXX   |                        |       |       |       |       |       |       |       |       |          | XXX           | XXX   |                  |
| PEDI-CAT                                                                                              |                  | X               |       |                   |       |                        |       |       |       |       |       |       |       |       |          | X             |       |                  |
| ABAS-II                                                                                               |                  | X               |       |                   |       |                        |       |       |       |       |       |       |       |       |          | X             |       |                  |

|                                 |  |   |  |  |   |  |  |  |  |  |  |  |  |  |  |   |   |  |
|---------------------------------|--|---|--|--|---|--|--|--|--|--|--|--|--|--|--|---|---|--|
| BRIEF                           |  | X |  |  |   |  |  |  |  |  |  |  |  |  |  | X |   |  |
| Spence Children's Anxiety Scale |  | X |  |  |   |  |  |  |  |  |  |  |  |  |  | X |   |  |
| SEG-P                           |  | X |  |  |   |  |  |  |  |  |  |  |  |  |  | X |   |  |
| EQ-5D                           |  | X |  |  |   |  |  |  |  |  |  |  |  |  |  | X |   |  |
| CWIT                            |  | X |  |  |   |  |  |  |  |  |  |  |  |  |  | X |   |  |
| CTMT                            |  | X |  |  |   |  |  |  |  |  |  |  |  |  |  | X |   |  |
| GMFCS                           |  | X |  |  |   |  |  |  |  |  |  |  |  |  |  |   |   |  |
| MACS                            |  | X |  |  |   |  |  |  |  |  |  |  |  |  |  |   |   |  |
| Demographic                     |  | X |  |  |   |  |  |  |  |  |  |  |  |  |  |   |   |  |
| BFMDRS-D                        |  | X |  |  | X |  |  |  |  |  |  |  |  |  |  |   |   |  |
| BFMDRS-M                        |  | X |  |  |   |  |  |  |  |  |  |  |  |  |  |   |   |  |
| Classification of brain lesion  |  | X |  |  |   |  |  |  |  |  |  |  |  |  |  |   |   |  |
| WISC-IV                         |  | X |  |  |   |  |  |  |  |  |  |  |  |  |  |   |   |  |
| <b>ANALYSIS AND REPORTING</b>   |  |   |  |  |   |  |  |  |  |  |  |  |  |  |  |   |   |  |
| Study forms                     |  |   |  |  |   |  |  |  |  |  |  |  |  |  |  |   | X |  |
| Study files                     |  |   |  |  |   |  |  |  |  |  |  |  |  |  |  |   | X |  |
| Study findings                  |  |   |  |  |   |  |  |  |  |  |  |  |  |  |  |   | X |  |
| Summary letter                  |  |   |  |  |   |  |  |  |  |  |  |  |  |  |  |   | X |  |

*Note.* ABAS = Adaptive Behavior Assessment System; BFMDRS-D = Burke-Fahn-Marsden Dystonia Rating Scale-Disability; BFMDRS-M = Burke-Fahn-Marsden Dystonia Rating Scale-Movement; BRIEF = Behavioural Rating Inventory of Executive Function; COPM = Canadian Occupational Performance Measure; CO-OP = Cognitive Orientation to daily Occupational Performance; CWIT = Color Word Interference Test from Delis-Kaplan Exectutive Function System (D-KEFS); CTMT = Children Trail Making Test from the D-KEFS; EQ-5D = European Quality of Life-5 dimensions; GMFCS = Gross Motor Classification System; MACS = Manual Ability Classification System; PEDI-CAT = Pediatric Evaluation Disability Inventory-Computer Assessment Tool; PQRS = Performance Quality Rating Scale; SEG-P = Self -Efficacy Gauge-Paediatrics; WISC = Wechsler Intelligence Scale Children.
